# Supplementary material for: Characterization and Antibiotic Resistance of Listeria monocytogenes Strains Isolated from Greek Myzithra Soft Whey Cheese and Related Food Processing Surfaces over Two-and-a-Half Years of Safety Monitoring in a Cheese Processing Facility
Source: MDPI journal article supplement (doi:10.3390/foods12061200), 2023-03-12
Supplement: s1 [file s1]

Article

# Characterization and Antibiotic Resistance of *Listeria monocytogenes* Strains Isolated from Greek Myzithra Soft Whey Cheese and Related Food Processing Surfaces Over Two- and Half-Years of Safety Monitoring in a Cheese Processing Facility

Nikolaos D. Andritsos <sup>1</sup> and Marios Mataragas <sup>2,\*</sup>

<sup>1</sup> Department of Food Science and Technology, School of Agricultural Sciences, University of Patras, 2 G. Seferi Str., GR-301 00 Agrinio, Greece

<sup>2</sup> Department of Dairy Research, Institute of Technology of Agricultural Products, Hellenic Agricultural Organization “DEMETER”, 3 Ethnikis Antistaseos Str., GR-452 21 Ioannina, Greece

\* Correspondence: mmatster@gmail.com; Tel.: +30 26510 94780-9

## Supplementary Material

**Table S1.** *Listeria monocytogenes* strains used in the study.

| Strain No. | AAL code <sup>1</sup> | PCR-sero-group <sup>2</sup> | Serotype <sup>2</sup> | Sample                | Sampling date | Oxidase test   | Catalase reaction | Motility at 25 °C | Hemolysis on sheep blood agar | CAMP test            | L-Rhamnose utilization | D-Xylose utilization |
|------------|-----------------------|-----------------------------|-----------------------|-----------------------|---------------|----------------|-------------------|-------------------|-------------------------------|----------------------|------------------------|----------------------|
| 1          | 20153                 | IIb                         | 1/2b, 3b, 7           | Fresh Myzithra cheese | 11.11.2016    | - <sup>3</sup> | + <sup>4</sup>    | +                 | +                             | SA+/RE- <sup>5</sup> | +                      | -                    |
| 2          | 20158                 | IIa                         | 1/2a, 3a              | Fresh Myzithra cheese | 11.11.2016    | -              | +                 | +                 | +                             | SA+/RE-              | +                      | -                    |
| 3          | 20159                 | IIb                         | 1/2b, 3b, 7           | Fresh Myzithra cheese | 11.11.2016    | -              | +                 | +                 | +                             | SA+/RE-              | +                      | -                    |
| 4          | 20172                 | IIb                         | 1/2b, 3b, 7           | Fresh Myzithra cheese | 09.12.2016    | -              | +                 | +                 | +                             | SA+/RE-              | +                      | -                    |
| 5          | 20173                 | IIb                         | 1/2b, 3b, 7           | Fresh Myzithra cheese | 09.12.2016    | -              | +                 | +                 | +                             | SA+/RE-              | +                      | -                    |
| 6          | 20174                 | IIa                         | 1/2a, 3a              | Fresh Myzithra cheese | 09.12.2016    | -              | +                 | +                 | +                             | SA+/RE-              | +                      | -                    |
| 7          | 20180                 | IIb                         | 1/2b, 3b, 7           | Fresh Myzithra cheese | 20.12.2016    | -              | +                 | +                 | +                             | SA+/RE-              | +                      | -                    |

|    |       |     |             |                       |            |   |   |   |   |         |   |   |
|----|-------|-----|-------------|-----------------------|------------|---|---|---|---|---------|---|---|
| 8  | 20181 | IIb | 1/2b, 3b, 7 | Fresh Myzithra cheese | 20.12.2016 | - | + | + | + | SA+/RE- | + | - |
| 9  | 20182 | IIb | 1/2b, 3b, 7 | Fresh Myzithra cheese | 20.12.2016 | - | + | + | + | SA+/RE- | + | - |
| 10 | 20183 | IIb | 1/2b, 3b, 7 | Fresh Myzithra cheese | 20.12.2016 | - | + | + | + | SA+/RE- | + | - |
| 11 | 20184 | IIb | 1/2b, 3b, 7 | Fresh Myzithra cheese | 20.12.2016 | - | + | + | + | SA+/RE- | + | - |
| 12 | 20187 | IIb | 1/2b, 3b, 7 | Fresh Myzithra cheese | 10.01.2017 | - | + | + | + | SA+/RE- | + | - |
| 13 | 20396 | IIa | 1/2a, 3a    | Fresh Myzithra cheese | 27.01.2018 | - | + | + | + | SA+/RE- | + | - |
| 14 | 20410 | IIb | 1/2b, 3b, 7 | Fresh Myzithra cheese | 16.03.2018 | - | + | + | + | SA+/RE- | + | - |
| 15 | 20417 | IIa | 1/2a, 3a    | Fresh Myzithra cheese | 27.03.2018 | - | + | + | + | SA+/RE- | + | - |
| 16 | 20446 | IIb | 1/2b, 3b, 7 | Fresh Myzithra cheese | 11.05.2018 | - | + | + | + | SA+/RE- | + | - |
| 17 | 20452 | IIb | 1/2b, 3b, 7 | Fresh Myzithra cheese | 29.05.2018 | - | + | + | + | SA+/RE- | + | - |

|    |       |     |             |                         |            |   |   |   |   |         |   |   |
|----|-------|-----|-------------|-------------------------|------------|---|---|---|---|---------|---|---|
| 18 | 20453 | IIb | 1/2b, 3b, 7 | Fresh Myzithra cheese   | 29.05.2018 | - | + | + | + | SA+/RE- | + | - |
| 19 | 20454 | IIb | 1/2b, 3b, 7 | Fresh Myzithra cheese   | 29.05.2018 | - | + | + | + | SA+/RE- | + | - |
| 20 | 20493 | IIa | 1/2a, 3a    | Dried Myzithra cheese   | 03.08.2018 | - | + | + | + | SA+/RE- | + | - |
| 21 | 20494 | IVb | 4b, 4d, 4e  | Dried Myzithra cheese   | 03.08.2018 | - | + | + | + | SA+/RE- | + | - |
| 22 | 20502 | IIb | 1/2b, 3b, 7 | Fresh Myzithra cheese   | 10.08.2018 | - | + | + | + | SA+/RE- | + | - |
| 23 | 20503 | IIa | 1/2a, 3a    | Fresh Myzithra cheese   | 10.08.2018 | - | + | + | + | SA+/RE- | + | - |
| 24 | 20506 | IIb | 1/2b, 3b, 7 | Fresh Myzithra cheese   | 10.08.2018 | - | + | + | + | SA+/RE- | + | - |
| 25 | 20507 | IIb | 1/2b, 3b, 7 | Fresh Myzithra cheese   | 21.08.2018 | - | + | + | + | SA+/RE- | + | - |
| 26 | 20521 | IIb | 1/2b, 3b, 7 | Fresh Myzithra cheese   | 21.08.2018 | - | + | + | + | SA+/RE- | + | - |
| 27 | 20527 | IIb | 1/2b, 3b, 7 | Swab from surface No. 8 | 08.10.2018 | - | + | + | + | SA+/RE- | + | - |

|    |       |     |             |                           |            |   |   |   |   |         |   |   |
|----|-------|-----|-------------|---------------------------|------------|---|---|---|---|---------|---|---|
| 28 | 20535 | IIB | 1/2b, 3b, 7 | Dried Myzithra cheese     | 12.10.2018 | - | + | + | + | SA+/RE- | + | - |
| 29 | 20536 | IIB | 1/2b, 3b, 7 | Dried Myzithra cheese     | 19.10.2018 | - | + | + | + | SA+/RE- | + | - |
| 30 | 20537 | IIB | 1/2b, 3b, 7 | Fresh Myzithra cheese     | 19.10.2018 | - | + | + | + | SA+/RE- | + | - |
| 31 | 20548 | IIB | 1/2b, 3b, 7 | Swab from surface No. 26  | 19.10.2018 | - | + | + | + | SA+/RE- | + | - |
| 32 | 20557 | IIB | 1/2b, 3b, 7 | Swab from surface No. 3   | 26.10.2018 | - | + | + | + | SA+/RE- | + | - |
| 33 | 20558 | IIB | 1/2b, 3b, 7 | Fresh Myzithra cheese     | 15.11.2018 | - | + | + | + | SA+/RE- | + | - |
| 34 | 20559 | IIB | 1/2b, 3b, 7 | Fresh Myzithra cheese     | 23.11.2018 | - | + | + | + | SA+/RE- | + | - |
| 35 | 20560 | IIB | 1/2b, 3b, 7 | Swab from surface No. 6AM | 23.11.2018 | - | + | + | + | SA+/RE- | + | - |
| 36 | 20561 | IIB | 1/2b, 3b, 7 | Swab from surface No. 1M  | 23.11.2018 | - | + | + | + | SA+/RE- | + | - |
| 37 | 20562 | Ila | 1/2a, 3a    | Fresh Myzithra cheese     | 23.11.2018 | - | + | + | + | SA+/RE- | + | - |

|    |       |     |             |                         |            |   |   |   |   |         |   |   |
|----|-------|-----|-------------|-------------------------|------------|---|---|---|---|---------|---|---|
| 38 | 20567 | IIb | 1/2b, 3b, 7 | Dried Myzithra cheese   | 27.11.2018 | - | + | + | + | SA+/RE- | + | - |
| 39 | 20570 | IIb | 1/2b, 3b, 7 | Dried Myzithra cheese   | 4.12.2018  | - | + | + | + | SA+/RE- | + | - |
| 40 | 20571 | IIb | 1/2b, 3b, 7 | Fresh Myzithra cheese   | 11.12.2018 | - | + | + | + | SA+/RE- | + | - |
| 41 | 20572 | IIb | 1/2b, 3b, 7 | Fresh Myzithra cheese   | 11.12.2018 | - | + | + | + | SA+/RE- | + | - |
| 42 | 20580 | IIb | 1/2b, 3b, 7 | Fresh Myzithra cheese   | 11.12.2018 | - | + | + | + | SA+/RE- | + | - |
| 43 | 20584 | IIb | 1/2b, 3b, 7 | Fresh Myzithra cheese   | 11.12.2018 | - | + | + | + | SA+/RE- | + | - |
| 44 | 20585 | IIa | 1/2a, 3a    | Swab from surface No. 4 | 18.12.2018 | - | + | + | + | SA+/RE- | + | - |
| 45 | 20620 | IIb | 1/2b, 3b, 7 | Dried Myzithra cheese   | 18.12.2018 | - | + | + | + | SA+/RE- | + | - |
| 46 | 20640 | IIb | 1/2b, 3b, 7 | Fresh Myzithra cheese   | 01.03.2019 | - | + | + | + | SA+/RE- | + | - |
| 47 | 20650 | IIb | 1/2b, 3b, 7 | Fresh Myzithra cheese   | 09.04.2019 | - | + | + | + | SA+/RE- | + | - |

|    |       |     |             |                       |            |   |   |   |   |         |   |   |
|----|-------|-----|-------------|-----------------------|------------|---|---|---|---|---------|---|---|
| 48 | 20657 | IIb | 1/2b, 3b, 7 | Fresh Myzithra cheese | 03.05.2019 | - | + | + | + | SA+/RE- | + | - |
| 49 | 20658 | IIb | 1/2b, 3b, 7 | Fresh Myzithra cheese | 15.05.2019 | - | + | + | + | SA+/RE- | + | - |
| 50 | 20659 | IIb | 1/2b, 3b, 7 | Fresh Myzithra cheese | 15.05.2019 | - | + | + | + | SA+/RE- | + | - |
| 51 | 20660 | IIa | 1/2a, 3a    | Fresh Myzithra cheese | 15.05.2019 | - | + | + | + | SA+/RE- | + | - |
| 52 | 20716 | IIb | 1/2b, 3b, 7 | Fresh Myzithra cheese | 15.05.2019 | - | + | + | + | SA+/RE- | + | - |
| 53 | 20717 | IIb | 1/2b, 3b, 7 | Fresh Myzithra cheese | 02.07.2019 | - | + | + | + | SA+/RE- | + | - |
| 54 | 20734 | IIb | 1/2b, 3b, 7 | Dried Myzithra cheese | 02.07.2019 | - | + | + | + | SA+/RE- | + | - |

<sup>1</sup> AAL: Eurofins Athens Analysis Laboratories S.A.; Microbiology Laboratory, Metamorfosi, Attica, Greece.

<sup>2</sup> PCR-serogroup and serotype designation of *L. monocytogenes* performed *in silico* using Bionumerics version 8.1.1. (<https://www.applied-maths.com/bionumerics>).

<sup>3</sup> -: negative reaction/result.

<sup>4</sup> +: positive reaction/result.

<sup>5</sup> SA+/RE-: positive reaction with *Staphylococcus aureus* and negative reaction with *Rhodococcus equi* (CAMP test).

**Disclaimer/Publisher's Note:** The statements, opinions and data contained in all publications are solely those of the individual author(s) and contributor(s) and not of MDPI and/or the editor(s). MDPI and/or the editor(s) disclaim responsibility for any injury to people or property resulting from any ideas, methods, instructions or products referred to in the content.
